# Supplementary material for: Dynamic QTL analysis for developmental behavior of cell wall components and forage digestibility in maize (Zea mays L.)
Source: Research Square preprint supplement (doi:10.21203/rs.3.rs-128172/v1), 2020-12-17
Supplement: Supplementary file 1 [file debda518964275b166e93fd9.xlsx]

## Sheet: Additional file 4
Trait	variance	Df	Sum Sq	Mean Sq	F value	Pr(>F)
ADF_I	environment	1	1920.47	1920.47	596.744	1.45417e-78
ADF_I	lines	219	4737.03	21.6303	6.72114	1.02196e-56
ADF_I	rep:environment	2	14.2846	7.14229	2.21931	0.110161
ADF_I	environment:lines	210	1279.68	6.09371	1.89349	5.27576e-08
ADF_I	Residuals	362	1165	3.21824
CEL_I	environment	1	144.378	144.378	55.0193	8.64744e-13
CEL_I	lines	219	4053.37	18.5085	7.05321	4.02728e-59
CEL_I	rep:environment	2	18.2321	9.11606	3.47394	0.0320378
CEL_I	environment:lines	209	1091.24	5.22125	1.98971	5.35041e-09
CEL_I	Residuals	360	944.687	2.62413
IVDMD_I	environment	1	42275.1	42275.1	1781.85	8.43486e-140
IVDMD_I	lines	219	23478.9	107.209	4.51876	2.0665e-36
IVDMD_I	rep:environment	2	351.181	175.59	7.40093	0.00071049
IVDMD_I	environment:lines	209	8244.04	39.4452	1.66257	1.38398e-05
IVDMD_I	Residuals	352	8351.35	23.7254
LIG_I	environment	1	185.193	185.193	1562.96	8.70912e-134
LIG_I	lines	219	167	0.762555	6.43567	1.3646e-54
LIG_I	rep:environment	2	0.484478	0.242239	2.0444	0.130941
LIG_I	environment:lines	210	36.026	0.171552	1.44784	0.00106915
LIG_I	Residuals	364	43.13	0.118489
NDF_I	environment	1	1525.96	1525.96	328.421	1.06894e-52
NDF_I	lines	219	5142.22	23.4804	5.0535	3.29258e-42
NDF_I	rep:environment	2	0.513475	0.256737	0.0552555	0.946251
NDF_I	environment:lines	210	1589.36	7.56836	1.62888	2.53314e-05
NDF_I	Residuals	362	1681.98	4.64637
ADF_II	environment	1	869.699	869.699	123.628	7.3301e-25
ADF_II	lines	219	7426.65	33.9116	4.82054	1.19264e-39
ADF_II	rep:environment	2	10.6082	5.30408	0.753975	0.47124
ADF_II	environment:lines	206	3054.41	14.8272	2.10769	3.47268e-10
ADF_II	Residuals	357	2511.43	7.03482
CEL_II	environment	1	42.9317	42.9317	6.46995	0.0113948
CEL_II	lines	219	6108.7	27.8936	4.20365	1.89887e-33
CEL_II	rep:environment	2	37.5956	18.7978	2.83289	0.0601738
CEL_II	environment:lines	207	2545.22	12.2957	1.85301	1.7689e-07
CEL_II	Residuals	355	2355.63	6.63556
IVDMD_II	environment	1	26590.7	26590.7	653.775	3.63055e-82
IVDMD_II	lines	219	38325.2	175.001	4.30267	3.20865e-34
IVDMD_II	rep:environment	2	283.914	141.957	3.49025	0.0315559
IVDMD_II	environment:lines	206	17458.8	84.7517	2.08376	7.39388e-10
IVDMD_II	Residuals	351	14276.1	40.6726
LIG_II	environment	1	57.1323	57.1323	225.623	6.86256e-40
LIG_II	lines	219	263.531	1.20334	4.75214	4.65547e-39
LIG_II	rep:environment	2	2.73664	1.36832	5.40369	0.00487455
LIG_II	environment:lines	208	109.623	0.527035	2.08133	5.95979e-10
LIG_II	Residuals	358	90.6527	0.25322
NDF_II	environment	1	484.491	484.491	50.6292	6.12507e-12
NDF_II	lines	219	8968.96	40.9542	4.2797	2.19712e-34
NDF_II	rep:environment	2	59.2771	29.6386	3.09722	0.0463872
NDF_II	environment:lines	207	4368.54	21.1041	2.20537	2.72809e-11
NDF_II	Residuals	358	3425.85	9.5694
ADF_III	environment	1	836.862	836.862	43.4533	1.55252e-10
ADF_III	lines	219	16975.6	77.5142	4.02485	8.05383e-32
ADF_III	rep:environment	2	44.9614	22.4807	1.16729	0.312388
ADF_III	environment:lines	209	5894.13	28.2016	1.46434	0.000812625
ADF_III	Residuals	359	6913.94	19.2589
CEL_III	environment	1	2453.91	2453.91	140.205	1.56749e-27
CEL_III	lines	219	14874.5	67.9203	3.88064	2.61588e-30
CEL_III	rep:environment	2	22.6186	11.3093	0.646158	0.524663
CEL_III	environment:lines	209	5599	26.7895	1.53062	0.000215594
CEL_III	Residuals	359	6283.34	17.5023
IVDMD_III	environment	1	1164.42	1164.42	14.9268	0.00013291
IVDMD_III	lines	219	77760.7	355.072	4.55167	7.41842e-37
IVDMD_III	rep:environment	2	324.164	162.082	2.07773	0.126738
IVDMD_III	environment:lines	209	24173.1	115.661	1.48265	0.000587787
IVDMD_III	Residuals	354	27615.2	78.0091
LIG_III	environment	1	9.75503	9.75503	17.9202	2.92387e-05
LIG_III	lines	219	449.441	2.05224	3.77	2.85835e-29
LIG_III	rep:environment	2	0.305725	0.152862	0.280811	0.755336
LIG_III	environment:lines	209	145.735	0.697298	1.28095	0.0204513
LIG_III	Residuals	362	197.059	0.544361
NDF_III	environment	1	2862.63	2862.63	115.048	1.84117e-23
NDF_III	lines	219	22445.1	102.489	4.11899	9.61712e-33
NDF_III	rep:environment	2	155.764	77.8822	3.13005	0.0449142
NDF_III	environment:lines	209	7686.94	36.7796	1.47816	0.000624289
NDF_III	Residuals	358	8907.78	24.8821
ADF_IV	environment	1	9602.42	9602.42	374.771	2.52602e-57
ADF_IV	lines	219	18596.2	84.9143	3.3141	6.9392e-24
ADF_IV	rep:environment	2	48.9188	24.4594	0.954621	0.385955
ADF_IV	environment:lines	208	7263.93	34.9227	1.36299	0.00555284
ADF_IV	Residuals	351	8993.36	25.6221
CEL_IV	environment	1	13797.2	13797.2	618.539	1.92798e-79
CEL_IV	lines	219	14470.6	66.0757	2.96222	5.40591e-20
CEL_IV	rep:environment	2	34.4378	17.2189	0.771936	0.462901
CEL_IV	environment:lines	207	6987.2	33.7546	1.51324	0.000338361
CEL_IV	Residuals	351	7829.45	22.3061
IVDMD_IV	environment	1	11225.4	11225.4	96.6641	2.80181e-20
IVDMD_IV	lines	219	91317.6	416.975	3.59066	1.16846e-26
IVDMD_IV	rep:environment	2	408.208	204.104	1.75758	0.173997
IVDMD_IV	environment:lines	206	32577.6	158.144	1.36181	0.00590945
IVDMD_IV	Residuals	346	40180.2	116.128
LIG_IV	environment	1	67.4812	67.4812	98.6904	1.10711e-20
LIG_IV	lines	219	470.731	2.14946	3.14355	3.84255e-22
LIG_IV	rep:environment	2	0.0733223	0.0366612	0.0536165	0.947803
LIG_IV	environment:lines	208	168.213	0.808716	1.18274	0.0841293
LIG_IV	Residuals	355	242.737	0.683767
NDF_IV	environment	1	20069.9	20069.9	499.409	1.97418e-69
NDF_IV	lines	219	28625.9	130.712	3.25256	3.27348e-23
NDF_IV	rep:environment	2	157.474	78.737	1.95925	0.142503
NDF_IV	environment:lines	207	11863.3	57.3108	1.42609	0.00181358
NDF_IV	Residuals	351	14105.7	40.1873
ADF_V	environment	1	450.19	450.19	58.3782	1.51762e-13
ADF_V	lines	219	4628.21	21.1334	2.74046	6.09401e-19
ADF_V	rep:environment	2	80.4024	40.2012	5.21307	0.00580806
ADF_V	environment:lines	218	2334.86	10.7104	1.38886	0.00234548
ADF_V	Residuals	414	3192.61	7.71162
CEL_V	environment	1	252.635	252.635	36.2084	3.90586e-09
CEL_V	lines	219	4330.88	19.7757	2.83432	4.11665e-20
CEL_V	rep:environment	2	31.5556	15.7778	2.26132	0.105499
CEL_V	environment:lines	218	2077.62	9.53037	1.36592	0.00364793
CEL_V	Residuals	414	2888.58	6.97724
IVDMD_V	environment	1	31751.8	31751.8	787.284	1.01306e-96
IVDMD_V	lines	219	26818.8	122.46	3.03639	2.68488e-22
IVDMD_V	rep:environment	2	464	232	5.75244	0.00344215
IVDMD_V	environment:lines	216	13891.4	64.3121	1.59462	3.22037e-05
IVDMD_V	Residuals	402	16213	40.3308
LIG_V	environment	1	83.8712	83.8712	456.337	7.73579e-69
LIG_V	lines	219	153.326	0.700118	3.80929	5.55262e-32
LIG_V	rep:environment	2	0.65468	0.32734	1.78103	0.169749
LIG_V	environment:lines	218	68.6488	0.314903	1.71336	1.55212e-06
LIG_V	Residuals	415	76.2738	0.183792
NDF_V	environment	1	148.387	148.387	12.2082	0.000527513
NDF_V	lines	219	6177.45	28.2075	2.3207	1.14162e-13
NDF_V	rep:environment	2	115.376	57.6882	4.74615	0.00916679
NDF_V	environment:lines	218	3827.46	17.5572	1.44447	0.000778
NDF_V	Residuals	411	4995.6	12.1547
