# Supplementary material for: Dynamic QTL analysis for developmental behavior of cell wall components and forage digestibility in maize (Zea mays L.)
Source: Research Square preprint supplement (doi:10.21203/rs.3.rs-128172/v1), 2020-12-17
Supplement: Supplementary file 2 [file f7fd515e6f4b08ee9e418808.xlsx]

## Sheet: Additional file 3
Trait	environment	lines	rep:environment	env:lines	Residuals	H	H.low	H.up
ADF_I	1920.47**	21.63**	7.14	6.09**	3.22	0.72	0.65	0.78
ADF_II	869.7**	33.91**	5.3	14.83**	7.03	0.56	0.45	0.65
ADF_III	836.86**	77.51**	22.48	28.2**	19.26	0.64	0.54	0.71
ADF_IV	9602.42**	84.91**	24.46	34.92**	25.62	0.59	0.48	0.67
ADF_V	450.19**	21.13**	40.2**	10.71**	7.71	0.49	0.37	0.59
CEL_I	144.38**	18.51**	9.12*	5.22**	2.62	0.72	0.65	0.77
CEL_II	42.93*	27.89**	18.8	12.3**	6.64	0.56	0.45	0.65
CEL_III	2453.91**	67.92**	11.31	26.79**	17.5	0.61	0.51	0.69
CEL_IV	13797.21**	66.08**	17.22	33.75**	22.31	0.49	0.36	0.59
CEL_V	252.63**	19.78**	15.78	9.53**	6.98	0.52	0.4	0.61
IVDMD_I	42275.05**	107.21**	175.59**	39.45**	23.73	0.63	0.54	0.71
IVDMD_II	26590.69**	175**	141.96*	84.75**	40.67	0.52	0.39	0.61
IVDMD_III	1164.42**	355.07**	162.08	115.66**	78.01	0.67	0.59	0.74
IVDMD_IV	11225.38**	416.98**	204.1	158.14**	116.13	0.62	0.52	0.7
IVDMD_V	31751.75**	122.46**	232**	64.31**	40.33	0.47	0.34	0.58
LIG_I	185.19**	0.76**	0.24	0.17**	0.12	0.78	0.72	0.82
LIG_II	57.13**	1.2**	1.37**	0.53**	0.25	0.56	0.45	0.65
LIG_III	9.76**	2.05**	0.15	0.7*	0.54	0.66	0.57	0.73
LIG_IV	67.48**	2.15**	0.04	0.81	0.68	0.62	0.53	0.7
LIG_V	83.87**	0.7**	0.33	0.31**	0.18	0.55	0.44	0.64
NDF_I	1525.96**	23.48**	0.26	7.57**	4.65	0.68	0.6	0.74
NDF_II	484.49**	40.95**	29.64*	21.1**	9.57	0.48	0.35	0.59
NDF_III	2862.63**	102.49**	77.88*	36.78**	24.88	0.64	0.55	0.71
NDF_IV	20069.92**	130.71**	78.74	57.31**	40.19	0.56	0.45	0.65
NDF_V	148.39**	28.21**	57.69**	17.56**	12.15	0.38	0.22	0.5
